# Supplementary material for: Genotype Calling from Population-Genomic Sequencing Data
Source: G3 (Bethesda). 2017 Jan 19;7(5):1393–404. doi: 10.1534/g3.117.039008 (PMC5427492; doi:10.1534/g3.117.039008)
Supplement: Supplementary file 6 [file 1393FileS4.pdf]

# BGC.cpp

January 18, 2017

Author: Takahiro Maruki

C++ program of a Bayesian genotype caller for diploid organisms useful for calling genotypes from low-coverage sequencing data

This C++ program is for calling genotypes from nucleotide-read quartets (read counts of A, C, G, and T) derived from individual high-throughput sequencing data for multiple diploid individuals from a population by a maximum-likelihood (ML) method. This genotype caller incorporates the genotype-frequency and sequencing-error rate estimates predetermined by an ML genotype-frequency estimator (GFE) (Maruki and Lynch 2015) to improve the accuracy of genotypes called from low-coverage sequencing data. At each of the significantly polymorphic sites pre-identified by GFE, the genotype for each individual is estimated by maximizing the likelihood of the observed data.

**Input file.** The input file is a tab-delimited text file, and can be prepared using GFE\_v2.0.cpp, specifying the mode as 'c'. The meanings of the first twelve columns are: 1) scaffold (chromosome) identifier; 2) site identifier (coordinate); 3) nucleotide of the reference sequence; 4, 5) nucleotides of the major and minor alleles, respectively (1: A, 2: C, 3: G, 4: T); 6) depth of coverage in the population sample (sum of the coverage over the individuals); 7) sequencing-error rate estimate; 8, 9, 10) ML estimates of the frequencies of major homozygotes, heterozygotes, and minor homozygotes, respectively; 11) likelihood-ratio test statistic for polymorphism; 12) likelihood-ratio test statistic for deviation from Hardy-Weinberg equilibrium. Thereafter, nucleotide-read quartets are shown for each individual in each of the columns.

**Output file.** The output file is also a tab-delimited file. The meanings of the first five columns are: 1) scaffold (chromosome) identifier; 2) site identifier (coordinate); 3) major-allele frequency; 4) sequencing-error rate estimate; 5) depth of coverage in the population sample (sum of the coverage over the individuals). Thereafter, the called genotype is shown for each individual in each of the columns.

## Reference

If you use this program, please cite the following paper:

Maruki, T., and Lynch, M., (in press) Genotype calling from population-genomic sequencing data. *G3: Genes / Genomes / Genetics*.

## Instructions

Below are specific procedures for using the program:

1. Make the input file, using GFE\_v2.0 in the 'c' mode.
2. Compile the program by typing the following command:

```
g++ -o BGC BGC.cpp -lm
```

3. Run the program by typing the following command:

```
./BGC -in In_BGC.txt -out Out_BGC.txt
```

- In\_BGC.txt and Out\_BGC.txt are default names of the input and output files, respectively. The input and output file names can be specified by adding the '-in' and '-out' options, respectively.

- The minimum required coverage and maximum allowed coverage to call a genotype of an individual can be specified by adding the '-min\_cov' and '-max\_cov' options, respectively. Their default values are 1 and 2,000,000,000, respectively.

- The posterior probabilities of the genotypes for each individual can be shown in the output by adding the '-gp' option. When this value is set at one, the posterior probabilities of the major and minor homozygotes separated by a slash are shown for each individual.

- A usage help message explaining these options can be shown by typing the following command:

```
./BGC -h
```

## Copyright notice

This program is freely available; and can be redistributed and/or modified under the terms of the GNU General Public License as published by the Free Software Foundation; either version 2 of the License, or (at your option) any later version.

This program is distributed in the hope that it will be useful, but WITHOUT ANY WARRANTY; without even the implied warranty of MERCHANTABILITY or FITNESS FOR A PARTICULAR PURPOSE. See the GNU General Public License for more details.

For a copy of the GNU General Public License write to the Free Software Foundation, Inc., 59 Temple Place, Suite 330, Boston, MA 02111-1307 USA

## Contact

If you have difficulty using this software, please send the following information to Takahiro Maruki ([tmaruki@indiana.edu](mailto:tmaruki@indiana.edu)):

1. Brief explanation of the problem.
2. Command entered.
3. Part of the input file.
4. Part of the output file.
